# Supplementary material for: Highly anisotropic 1/3-magnetization plateau in a ferrimagnet Cs2Cu3(SeO3)4·2H2O: topology of magnetic bonding necessary for magnetization plateau
Source: Royal Society of Chemistry journal article supplement (doi:10.1039/d2dt03517k), 2022-11-30
Supplement: d2dt03517k1.pdf [file d2dt03517k1.pdf]

## Highly Anisotropic 1/3-Magnetization Plateau in a Ferrimagnet $\text{Cs}_2\text{Cu}_3(\text{SeO}_3)_4 \cdot 2\text{H}_2\text{O}$ : Topology of Magnetic Bonding Required for Magnetization Plateau

Artem V. Moskin,<sup>[a,b]</sup> Ekaterina S. Kozlyakova,<sup>[a,b]</sup> Larisa A. Shvanskaya,<sup>[a,b]</sup> Dmitry A. Chareev,<sup>[b,c]</sup> Hyun-Joo Koo,<sup>[d]</sup> Myung-Hwan Whangbo,<sup>\*,[d,e]</sup> and Alexander N. Vasiliev<sup>\*,[a,b]</sup>

<sup>1</sup>Lomonosov Moscow State University, Moscow 119991, Russia

<sup>2</sup>National University of Science and Technology "MISIS", Moscow 119049, Russia

<sup>3</sup>Institute of Experimental Mineralogy, RAS, Chernogolovka 142432, Russia

<sup>4</sup>Department of Chemistry and Research Institute for Basic Sciences, Kyung Hee University, Seoul 02447, Republic of Korea

<sup>5</sup> Department of Chemistry, North Carolina State University, Raleigh, NC 27695, USA

We prepared  $\text{Cs}_2\text{Cu}_3(\text{SeO}_3)_4 \cdot 2\text{H}_2\text{O}$  composed of  $\text{Cu}^{2+}$  ions at square-planar coordination sites and characterized its structural and magnetic properties, to show that  $\text{Cs}_2\text{Cu}_3(\text{SeO}_3)_4 \cdot 2\text{H}_2\text{O}$  is a ferrimagnet exhibiting a highly anisotropic 1/3-magnetization plateau. This unprecedented anisotropy in a magnetization plateau is the consequence of three effects, namely, the orthogonal arrangements of the corner-sharing  $\text{CuO}_4$  square planes, the nearest-neighbor antiferromagnetic exchange, and the anisotropic  $g$ -factor of the  $\text{Cu}^{2+}$  ions. By analyzing the topology of magnetic bonding, we explored why magnetic plateaus are observed only for certain ferrimagnets and antiferromagnets.

Email: [mike\\_whangbo@ncsu.edu](mailto:mike_whangbo@ncsu.edu)

Email: [vasil@lt.phys.msu.ru](mailto:vasil@lt.phys.msu.ru)

### S1. Bond valence sum analysis

Selected geometric parameters, selected hydrogen-bond parameters and bond valence sum (BVS) data for  $\text{Cs}_2\text{Cu}_3(\text{SeO}_3)_4 \cdot 2\text{H}_2\text{O}$  are given in Tables S1-S3. The BVS calculation (Table S3) are in full agreement with the expected oxidation states of all atoms and consistent with the assignment of  $\text{H}_2\text{O}$  molecule [1].

Table S1. Selected bond lengths around cations (Å)

|                      |           |                        |           |
|----------------------|-----------|------------------------|-----------|
| Cs—O4 <sup>i</sup>   | 3.243 (3) | Cu1—O1 <sup>vi</sup>   | 1.949 (3) |
| Cs—O4 <sup>ii</sup>  | 3.243 (3) | Cu1—O1 <sup>vii</sup>  | 1.949 (3) |
| Cs—O4 <sup>iii</sup> | 3.295 (3) | Cu1—O1 <sup>viii</sup> | 1.949 (3) |
| Cs—O4                | 3.295 (3) | Cu1—O1                 | 1.949 (3) |
| Cs—O4 <sup>iv</sup>  | 3.340 (3) | Cu1—O3                 | 2.882 (5) |
| Cs—O4 <sup>v</sup>   | 3.340 (3) | Cu1—O3 <sup>viii</sup> | 2.882 (5) |

|                      |           |                       |             |
|----------------------|-----------|-----------------------|-------------|
| Cs—O2 <sup>ii</sup>  | 3.522 (3) | Cu2—O2                | 1.966 (3)   |
| Cs—O2 <sup>i</sup>   | 3.522 (3) | Cu2—O2 <sup>ix</sup>  | 1.966 (3)   |
| Cs—O2                | 3.649 (3) | Cu2—O1 <sup>vii</sup> | 2.015 (3)   |
| Cs—O2 <sup>iii</sup> | 3.649 (3) | Cu2—O1 <sup>x</sup>   | 2.015 (3)   |
| Se—O4                | 1.658 (3) | Cu2—O3                | 2.3766 (13) |
| Se—O2                | 1.695 (3) | Cu2—O3 <sup>ix</sup>  | 2.3766 (13) |
| Se—O1                | 1.766 (3) |                       |             |

Symmetry code(s): (i)  $x, y-1/2, -z$ ; (ii)  $-x, -y+1, -z$ ; (iii)  $-x, -y+1/2, z$ ; (iv)  $y-1/4, -x+1/4, -z+1/4$ ; (v)  $-y+1/4, x+1/4, -z+1/4$ ; (vi)  $-x+1, -y+3/2, z$ ; (vii)  $-y+5/4, x+1/4, -z+1/4$ ; (viii)  $y-1/4, -x+5/4, -z+1/4$ ; (ix)  $-x+1, -y+1, -z$ ; (x)  $y-1/4, -x+3/4, z-1/4$ .

Table S2. Selected hydrogen-bond parameters of  $D—H\cdots A$ , where  $D$  and  $A$  refer to the hydrogen bond donor and acceptor atoms, respectively.

| $D—H\cdots A$                 | $D—H$ (Å)  | $H\cdots A$ (Å) | $D\cdots A$ (Å) | $D—H\cdots A$ (°) |
|-------------------------------|------------|-----------------|-----------------|-------------------|
| O3—H $\cdots$ O4 <sup>i</sup> | 0.832 (19) | 1.98 (2)        | 2.814 (4)       | 174 (6)           |

Symmetry code(s): (i)  $-y+5/4, x+3/4, z-1/4$ .

Table S3. Bond valence sums calculated for  $Cs_2Cu_3(SeO_3)_4\cdot 2H_2O$

| Atom     | Cs                                                              | Cu1                 | Cu2                 | Se    | H                  | $\Sigma$ |
|----------|-----------------------------------------------------------------|---------------------|---------------------|-------|--------------------|----------|
| O1       |                                                                 | 0.482 <sub>↓4</sub> | 0.403 <sub>↓2</sub> | 1.129 |                    | 2.014    |
| O2       | 0.051 <sub>↓2</sub> * 0.036 <sub>↓2</sub>                       |                     | 0.460 <sub>↓2</sub> | 1.368 |                    | 1.828    |
| O3       |                                                                 | 0.039 <sub>↓2</sub> | 0.152 <sub>↓2</sub> |       | 0.83 <sub>→2</sub> | 2.042    |
| O4       | 0.107 <sub>↓2</sub> ; 0.093 <sub>↓2</sub> ; 0.083 <sub>↓2</sub> |                     |                     | 1.512 | 0.17               | 1.965    |
| $\Sigma$ |                                                                 | 2.006               | 2.030               | 4.009 | 1                  |          |

\*Symbols  $\rightarrow$  and  $\downarrow$  denote an increase in the corresponding contributions in rows and columns due to symmetry

## S2. ac magnetic susceptibility

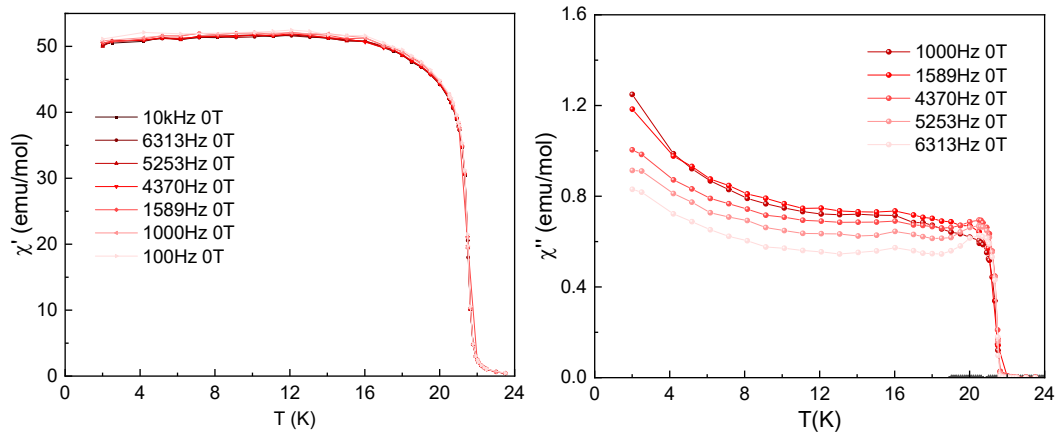

Fig. S1. Real (left panel) and imaginary (right panel) parts of ac magnetic susceptibility in  $\text{Cs}_2\text{Cu}_3(\text{SeO}_3)_4 \cdot 2\text{H}_2\text{O}$ .

### S3. Energy mapping analysis for spin exchange

To evaluate the spin exchanges  $J_1 - J_3$ , we employ the spin Hamiltonian defined as,

$$H_{spin} = - \sum_{i>j} J_{ij} \vec{S}_i \cdot \vec{S}_j,$$

where the spin exchange  $J_{ij}$  between two spin sites can be  $J_1$ ,  $J_2$ , or  $J_3$ . In this definition, AFM and FM exchanges are represented by negative and positive values of  $J_{ij}$ , respectively. To evaluate  $J_1 - J_3$ , we carry out the energy-mapping analysis based on DFT calculations<sup>12-14</sup> using the four ordered spin states shown in Fig. S1.

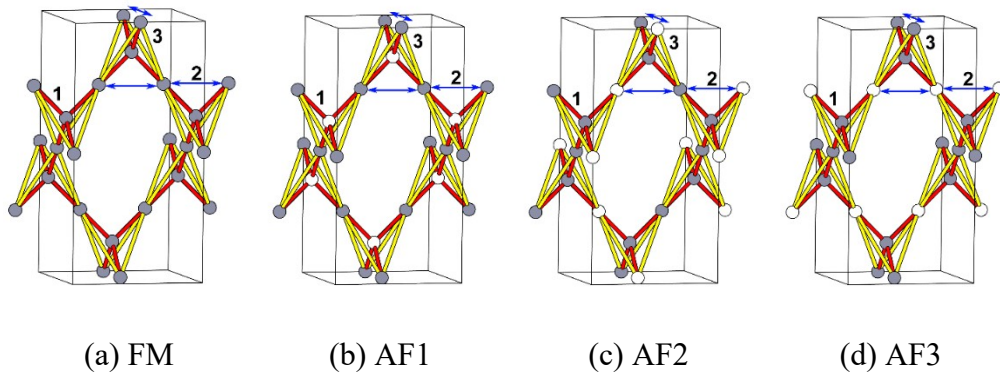

Fig. S2. Ordered spin arrangements of (a) FM, (b) AF1 (c) AF2 and (d) AF3. The grey and white circles indicate up and down spin sites of  $\text{Cu}^{2+}$  ions, respectively. The numbers 1 to 3 indicate the spin exchange paths  $J_1$  to  $J_3$ .

### References

1. Brown, I. D.; Altermatt, D. Bond-valence parameters obtained from a systematic analysis of the inorganic crystal structure database. *Acta Crystallogr. B* **1986**, 41, 244-247.
